# Supplementary material
Source: PubMed Central journal article supplement (PMC2528287)
Supplement: NIHMS59715-supplement-crystaldata.pdf [file NIHMS59715-supplement-crystaldata.pdf]

# **Enantioselective Total Synthesis of Lycopodine.**

*Hua Yang, Rich G. Carter\* and Lev N. Zakharov*

*Department of Chemistry, Oregon State University, Corvallis, OR 97331.*

---

**Electronic Supplementary Information: Crystallographic Data**

---

**Figure 1.** ORTEP Representation of X-Ray Crystallographic Analysis of Ketone **3**.

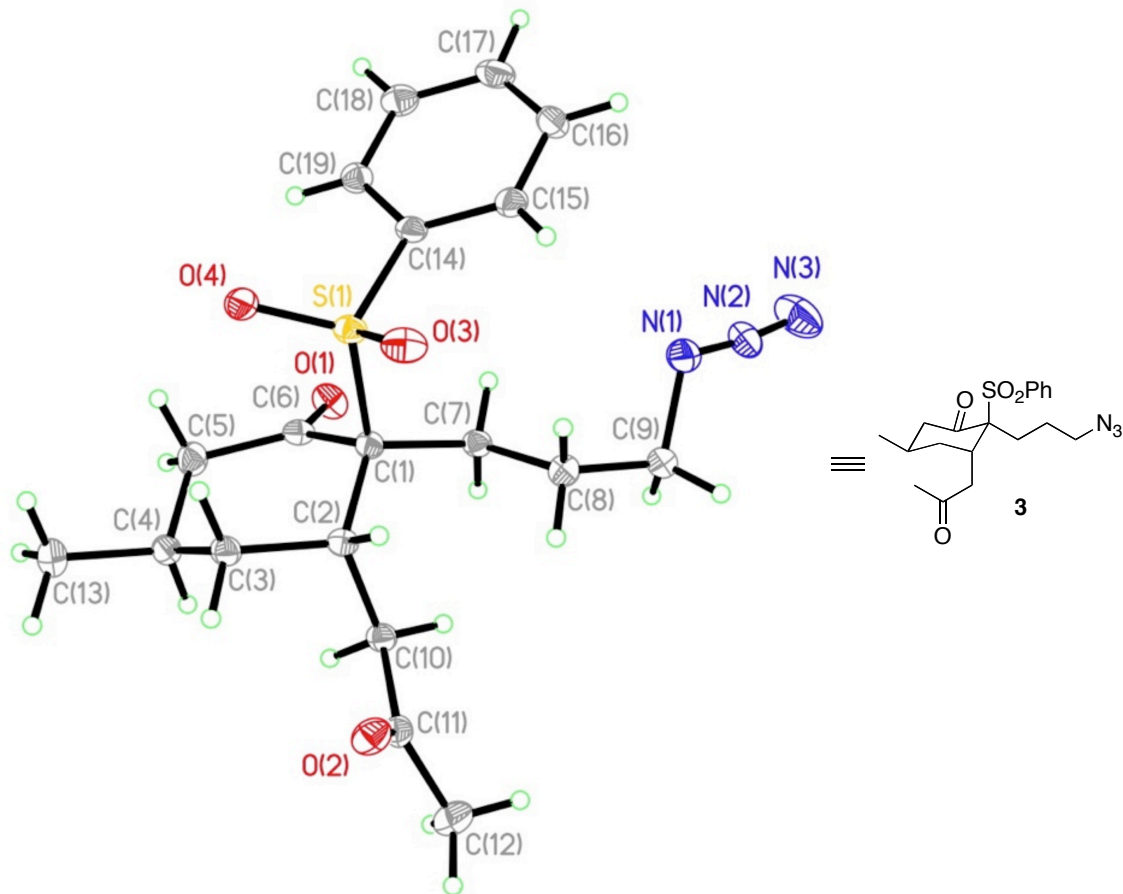

Table 1. Crystal data and structure refinement for rc28 (Compound **3**).

|                                   |                                                                 |          |
|-----------------------------------|-----------------------------------------------------------------|----------|
| Identification code               | rc28                                                            |          |
| Empirical formula                 | C <sub>19</sub> H <sub>25</sub> N <sub>3</sub> O <sub>4</sub> S |          |
| Formula weight                    | 391.48                                                          |          |
| Temperature                       | 173(2) K                                                        |          |
| Wavelength                        | 0.71073 Å                                                       |          |
| Crystal system                    | Orthorhombic                                                    |          |
| Space group                       | P2(1)2(1)2(1)                                                   |          |
| Unit cell dimensions              | a = 11.2466(8) Å                                                | a = 90°. |
|                                   | b = 11.9082(9) Å                                                | b = 90°. |
|                                   | c = 14.2975(10) Å                                               | g = 90°. |
| Volume                            | 1914.8(2) Å <sup>3</sup>                                        |          |
| Z                                 | 4                                                               |          |
| Density (calculated)              | 1.358 Mg/m <sup>3</sup>                                         |          |
| Absorption coefficient            | 0.199 mm <sup>-1</sup>                                          |          |
| F(000)                            | 832                                                             |          |
| Crystal size                      | 0.32 x 0.16 x 0.14 mm <sup>3</sup>                              |          |
| Theta range for data collection   | 2.23 to 27.00°.                                                 |          |
| Index ranges                      | -14<=h<=14, -15<=k<=15, -18<=l<=18                              |          |
| Reflections collected             | 21488                                                           |          |
| Independent reflections           | 4185 [R(int) = 0.0385]                                          |          |
| Completeness to theta = 27.00°    | 100.0 %                                                         |          |
| Absorption correction             | Semi-empirical from equivalents                                 |          |
| Max. and min. transmission        | 0.9726 and 0.9389                                               |          |
| Refinement method                 | Full-matrix least-squares on F <sup>2</sup>                     |          |
| Data / restraints / parameters    | 4185 / 0 / 344                                                  |          |
| Goodness-of-fit on F <sup>2</sup> | 1.086                                                           |          |
| Final R indices [I>2sigma(I)]     | R1 = 0.0356, wR2 = 0.0816                                       |          |
| R indices (all data)              | R1 = 0.0424, wR2 = 0.0861                                       |          |
| Absolute structure parameter      | 0.00(6)                                                         |          |
| Largest diff. peak and hole       | 0.255 and -0.169 e.Å <sup>-3</sup>                              |          |

**Figure 2.** ORTEP Representation of X-Ray Crystallographic Analysis of Tricycle 19.

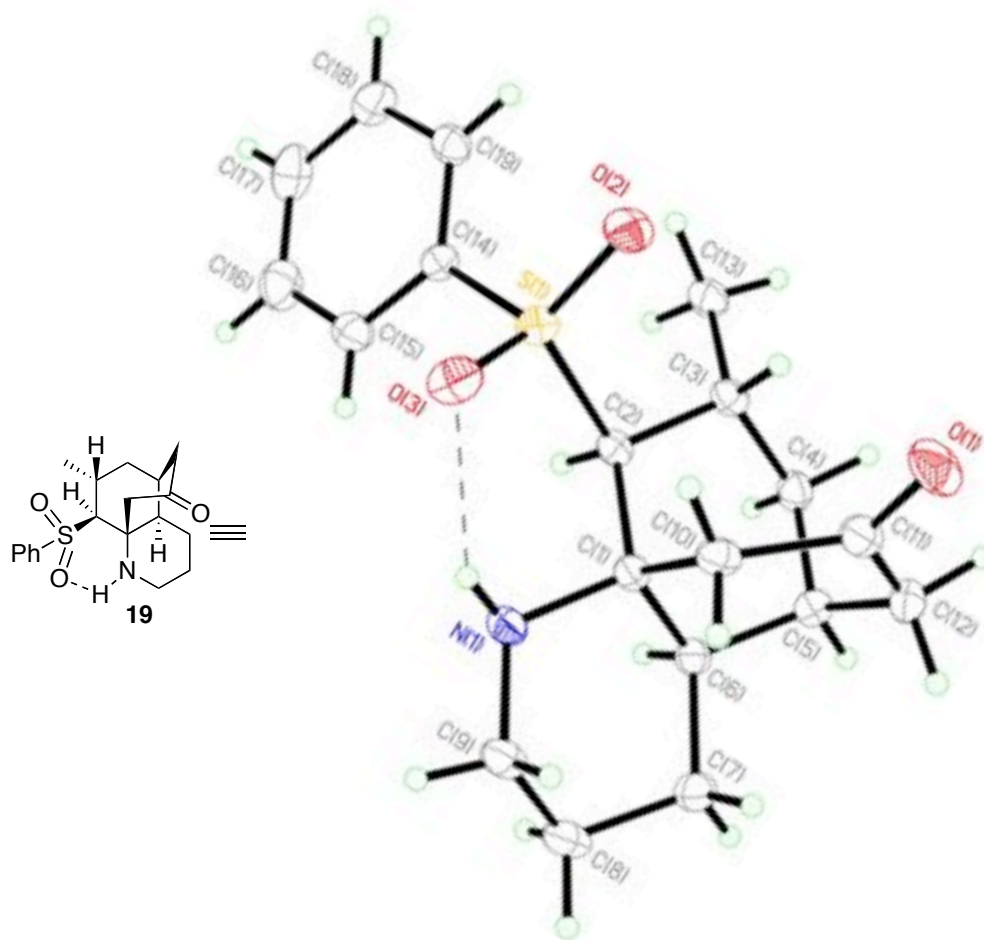

**Table 2.** Crystal data and structure refinement for rc31 (Compound **19**).

|                                   |                                                                                                    |
|-----------------------------------|----------------------------------------------------------------------------------------------------|
| Identification code               | rc31                                                                                               |
| Empirical formula                 | C <sub>19</sub> H <sub>25</sub> N O <sub>3</sub> S                                                 |
| Formula weight                    | 347.46                                                                                             |
| Temperature                       | 173(2) K                                                                                           |
| Wavelength                        | 0.71073 Å                                                                                          |
| Crystal system                    | Orthorhombic                                                                                       |
| Space group                       | P2(1)2(1)2(1)                                                                                      |
| Unit cell dimensions              | a = 9.3648(10) Å      a = 90°.<br>b = 10.0518(11) Å      b = 90°.<br>c = 18.751(2) Å      g = 90°. |
| Volume                            | 1765.1(3) Å <sup>3</sup>                                                                           |
| Z                                 | 4                                                                                                  |
| Density (calculated)              | 1.307 Mg/m <sup>3</sup>                                                                            |
| Absorption coefficient            | 0.200 mm <sup>-1</sup>                                                                             |
| F(000)                            | 744                                                                                                |
| Crystal size                      | 0.22 x 0.13 x 0.03 mm <sup>3</sup>                                                                 |
| Theta range for data collection   | 2.17 to 26.99°.                                                                                    |
| Index ranges                      | -11<=h<=11, -12<=k<=12, -23<=l<=23                                                                 |
| Reflections collected             | 19903                                                                                              |
| Independent reflections           | 3842 [R(int) = 0.0595]                                                                             |
| Completeness to theta = 26.99°    | 100.0 %                                                                                            |
| Absorption correction             | Semi-empirical from equivalents                                                                    |
| Max. and min. transmission        | 0.9940 and 0.9573                                                                                  |
| Refinement method                 | Full-matrix least-squares on F <sup>2</sup>                                                        |
| Data / restraints / parameters    | 3842 / 0 / 317                                                                                     |
| Goodness-of-fit on F <sup>2</sup> | 1.060                                                                                              |
| Final R indices [I>2sigma(I)]     | R1 = 0.0436, wR2 = 0.0799                                                                          |
| R indices (all data)              | R1 = 0.0618, wR2 = 0.0876                                                                          |
| Absolute structure parameter      | 0.03(8)                                                                                            |
| Largest diff. peak and hole       | 0.203 and -0.237 e.Å <sup>-3</sup>                                                                 |
