# Supplementary material
Source: PubMed Central journal article supplement (PMC2528287)
Supplement: NIHMS59715-supplement-Experimental.pdf [file NIHMS59715-supplement-Experimental.pdf]

# **Enantioselective Total Synthesis of Lycopodine.**

**Hua Yang, Rich G. Carter\* and Lev N. Zakharov**

*Department of Chemistry, Oregon State University, 153 Gilbert Hall,  
Corvallis, OR 97331.*

---

**Electronic Supplementary Information: Experimental**

---

**General.** Infrared spectra were recorded neat unless otherwise indicated and are reported in  $\text{cm}^{-1}$ .  $^1\text{H}$  NMR spectra were recorded in deuterated solvents and are reported in ppm relative to tetramethylsilane and referenced internally to the residually protonated solvent.  $^{13}\text{C}$  NMR spectra were recorded in deuterated solvents and are reported in ppm relative to tetramethylsilane and referenced internally to the residually protonated solvent.

Routine monitoring of reactions was performed using EM Science DC-Alufolien silica gel, aluminum-backed TLC plates. Flash chromatography was performed with the indicated eluents on EM Science Gedurian 230-400 mesh silica gel.

Air and/or moisture sensitive reactions were performed under usual inert atmosphere conditions. Reactions requiring anhydrous conditions were performed under a blanket of argon, in glassware dried in an oven at  $120^\circ\text{C}$  or by flame, then cooled under argon. Dry THF and DCM were obtained via a solvent purification system. All other solvents and commercially available reagents were either purified via literature procedures or used without further purification.

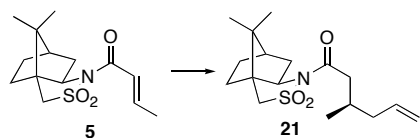

**Sultam 21:**  $\text{CuBr}\cdot\text{SMe}_2$  (7.83 g, 38.1 mmol) and  $\text{LiCl}$  (1.77 g, 41.8 mmol) were dissolved in THF (75 mL). The resulting solution was added to allylmagnesium bromide (34.4 mL, 31.3 mmol, 0.91 M in  $\text{Et}_2\text{O}$ ) at  $-78^\circ\text{C}$  via syringe.  $\text{TMSCl}$  (4.89 mL, 39.2 mmol) was then added followed by a solution of **5**<sup>11</sup> (7.40 g, 26.1 mmol) in THF (75 mL) after which the clear brown reaction mixture. After for 90 min, the reaction was quenched with aq.  $\text{NH}_4\text{Cl}$ - $\text{NH}_4\text{OH}$  (9:1, pH 9, 90 mL), warmed to rt and partitioned between  $\text{Et}_2\text{O}$  (50 mL) and water (50 mL). The aqueous layer was extracted with  $\text{EtOAc}$  (3 X 100 mL). The organic phase was washed with sat. aq.  $\text{NaCl}$  (100 mL). The dried extract ( $\text{MgSO}_4$ ) was concentrated *in vacuo* and purified by chromatography over silica gel, eluting with 5-10%  $\text{EtOAc}$  / Hexanes, to give known **21**<sup>2</sup> (7.27 g, 22.4 mmol, 86%) as a white solid:  $[\alpha]_{\text{D}}^{23} = -88^\circ$  ( $c = 3.6$ ,  $\text{CHCl}_3$ ); IR (neat) 2961, 1680, 1389, 1326, 1272, 1241, 1139, 1061, 918, 778, 615  $\text{cm}^{-1}$ ;  $^1\text{H}$  NMR (300 MHz,  $\text{CDCl}_3$ )  $\delta$  5.70-5.83 (m, 1H), 5.00-5.05 (m, 2H), 3.88 (t,  $J = 6.3$  Hz, 2H), 3.46 (q,  $J = 14.0$  Hz, 2H), 2.76 (dd,  $J = 16.0$ , 6.3 Hz, 1H), 2.49 (dd,  $J = 16.0$ , 7.5 Hz, 1H), 1.87-2.29 (m, 8H), 1.32-1.45 (m, 2H), 1.16 (s, 3H), 0.98 (s, 3H), 0.97 (d,  $J = 6.8$  Hz, 2H);  $^{13}\text{C}$  NMR (100 MHz,  $\text{CDCl}_3$ )  $\delta$  171.4, 136.5, 116.6, 65.2, 53.0, 48.3, 47.7, 44.7, 42.1, 40.9, 38.6, 32.8, 29.7, 26.5, 20.8, 19.9, 19.6; HRMS (EI+) calcd. for  $\text{C}_{17}\text{H}_{27}\text{NO}_3\text{S}$  (M<sup>+</sup>) 325.1722, found 325.1712.

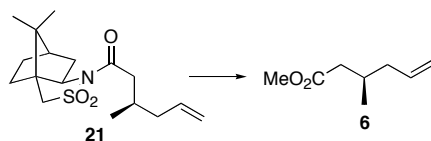

**Methyl Ester 6:** To a solution of **21** (6.92 g, 21.4 mmol) in  $\text{CH}_2\text{Cl}_2$  /  $\text{MeOH}$  (1:1, 105 mL) was added  $\text{Mg}(\text{OMe})_2$  (36.8 mL, 53.4 mmol, 1.45 M in  $\text{MeOH}$ ) at  $0^\circ\text{C}$ . After 3 h, the reaction mixture was quenched with sat. aq.  $\text{NH}_4\text{Cl}$  (40 mL) and extracted with  $\text{CH}_2\text{Cl}_2$  (3 X 50 mL). The dried ( $\text{Na}_2\text{SO}_4$ ) extract was concentrated *in vacuo*. The resulting mixture was extracted with hexanes (2 X 20 mL) and concentrated *in vacuo* to give known **6**<sup>2</sup> (3.00 g, 21.1 mmol, 99%) as a colorless liquid:  $[\alpha]_{\text{D}}^{23} = +3^\circ$  ( $c = 3.47$ ,  $\text{CHCl}_3$ ); IR (neat) 2954, 2922, 1734, 1434, 1261, 1222, 1173, 1005, 917  $\text{cm}^{-1}$ ;  $^1\text{H}$  NMR (300 MHz,  $\text{CDCl}_3$ )  $\delta$  5.69-5.82 (m, 1H), 5.02 (d,  $J = 13.0$  Hz, 2H), 3.66 (s, 3H), 2.26-2.36 (m, 1H), 1.98-2.14 (m, 4H), 0.95 (d,  $J = 5.4$  Hz, 3H);  $^{13}\text{C}$  NMR (100 MHz,  $\text{CDCl}_3$ )  $\delta$  173.6, 136.4, 116.6, 51.3, 41.0, 40.8, 30.1, 19.6; HRMS (EI+) calcd. for  $\text{C}_8\text{H}_{14}\text{O}_2$  (M<sup>+</sup>) 142.0994, found 142.1217.

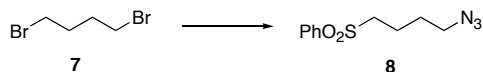

**Sulfone 8:** To a solution of 1,4-dibromobutane (**7**) (21.7 g, 12.0 mL, 100.5 mmol) in DMF (400 mL) was added  $\text{NaSO}_2\text{Ph}$  (16.5 g, 100.5 mmol) over a 30 min period. After stirring for 5 h,  $\text{NaN}_3$  (7.84 g, 120.6 mmol) and

water (40 mL) were added to the reaction mixture. The mixture was warmed to 50°C. After 6 h, the reaction mixture was poured into ice water (240 mL). The resulting solution was extracted with diethyl ether (3 X 200 mL). The dried (Na<sub>2</sub>SO<sub>4</sub>) extract was concentrated *in vacuo* and purified by chromatography over silica gel, eluting with 50-70% diethyl ether / hexanes, to give **8** (11.2 g, 46.9 mmol, 47%) as a colorless oil: IR (neat) 2942, 2090, 1445, 1299, 1140, 1088 cm<sup>-1</sup>; <sup>1</sup>H NMR (300 MHz, CDCl<sub>3</sub>) δ 7.92-7.94 (m, 2H), 7.58-7.72(m, 3H), 3.31 (t, *J* = 6.6 Hz, 2H), 3.14 (t, *J* = 7.5 Hz, 2H), 1.64-1.89 (m, 4H); <sup>13</sup>C NMR (75 MHz, CDCl<sub>3</sub>) δ 139.0, 133.8, 129.4, 128.1, 55.7, 5.07, 27.6, 20.2; HRMS (CI<sup>+</sup>) calcd. for C<sub>10</sub>H<sub>14</sub>N<sub>3</sub>O<sub>2</sub>S (M+H) 240.0806, found 240.0807.

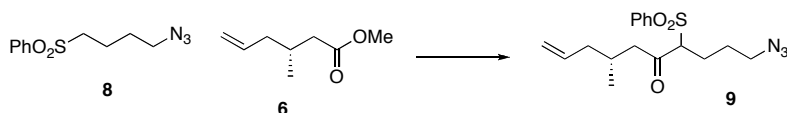

**Keto sulfone 9:** To a stirred solution of **8** (2.52 g, 10.55 mmol) in THF (120 mL) at -78°C was added lithium 2,2,6,6-tetramethylpiperidine<sup>3</sup> (21.1 mL, 21.1 mmol, 1.0 M in THF) dropwise. After 5 min, a solution of **6** (3.00 g, 21.1 mmol) in pre-cooled THF (5 mL) was added via cannula to the sulfone solution. After stirring at -78 to -20 °C for 90 min, the reaction was removed from the cooling bath, quenched with sat. aq. NH<sub>4</sub>Cl (40 mL) and extracted with Et<sub>2</sub>O (3 X 50 mL). The dried (Na<sub>2</sub>SO<sub>4</sub>) extract was concentrated *in vacuo* and purified chromatography over silica gel, eluting with 5-20% EtOAc / hexanes, to give **9** (2.72 g, 7.79 mmol, 74%) as a colorless oil: IR: (neat) 2959, 2929, 2873, 2095, 1712, 1449, 1320, 1153, 1084, 912, 748, 688 cm<sup>-1</sup>; <sup>1</sup>H NMR (400 MHz, CDCl<sub>3</sub>, two diastereomers) δ 7.80-7.82 (m, 2H), 7.71-7.75 (m, 1H), 7.59-7.61 (m, 2H), 5.73-5.79 (m, 1H), 5.03-5.08 (m, 2H), 4.11-4.16 (m, 1H), 3.26-3.30 (m, 2H), 2.93 (dd, *J* = 18.4, 5.2 Hz, 1H), 2.62-2.80 (m, 1H), 2.48 (dd, *J* = 18.4, 7.2 Hz, 1H), 1.87-2.15 (m, 5H), 1.46-1.80 (m, 2H), 0.97 (d, *J* = 6.4 Hz, 3H), 0.94 (d, *J* = 6.4 Hz, 3H); <sup>13</sup>C NMR (100 MHz, CDCl<sub>3</sub>) δ 201.6, 201.4, 136.34, 136.25, 136.20, 136.1, 134.5, 129.45, 129.43, 129.2, 116.9, 74.7, 74.4, 51.8, 51.6, 50.8, 40.9, 40.6, 28.3, 28.0, 26.3, 24.7, 24.6, 19.60, 19.57; HRMS (ES<sup>+</sup>) calcd. for C<sub>17</sub>H<sub>23</sub>N<sub>3</sub>O<sub>3</sub>NaS (M+Na) 372.1358, found 372.1333.

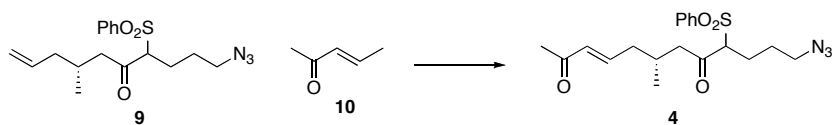

**Enone 4:** A solution of degassed 2<sup>nd</sup> Gen. Hoveyda-Grubbs catalyst (1.34 mg, 21.5 μmol) in CH<sub>2</sub>Cl<sub>2</sub> (0.22 mL) and 3-penten-2-one<sup>4</sup> (**10**) (54mg, 90 μL, 0.645 mmol, 70% pure) was added to alkene **9** (150 mg, 0.430 mmol). After 2 h, the reaction was cooled at 0 °C for 10 min and loaded directly onto silica gel. It was purified by chromatography, eluting with 10-30% EtOAc / hexanes, to give **4** (106 mg, 0.270 mmol, 63%) as colorless oil as well as recovered **9** (43 mg, 0.122 mmol, 28%): IR (neat) 2927, 2959, 2094, 1718, 1664, 1631, 1451, 1364, 1310, 1152, 743. 689, 591 cm<sup>-1</sup>; <sup>1</sup>H NMR (300 MHz, CDCl<sub>3</sub>, two diastereomers) δ 7.80 (d, *J* = 7.6 Hz, 2H), 7.73 (t, *J* = 7.6 Hz, 1H), 7.61 (t, *J* = 7.6 Hz, 2H), 6.71-6.80 (m, 1H), 6.08- 6.14 (m, 1H), 4.12-4.15 (m, 1H), 3.22-3.31 (m, 2H), 2.87-3.01 (m, 1H), 2.55-2.63 (m, 2H), 2.28 (s, 3H), 2.27 (s, 3H), 2.07-2.34 (m, 2H), 1.91-1.96 (m, 2H), 1.47-1.50 (m, 2H), 1.00 (d, *J* = 6.4 Hz, 3H), 0.97 (d, *J* = 6.4 Hz, 3H); <sup>13</sup>C NMR (100 MHz, CDCl<sub>3</sub>) δ 201.0, 200.9, 198.5, 198.4, 145.6, 136.13, 136.08, 134.6, 133.1, 133.0, 129.4, 129.2, 74.6, 74.5, 51.8, 51.6, 50.8, 39.3, 38.9, 27.91, 27.85, 27.1, 26.3, 24.72, 24.65, 19.73, 19.65; HRMS (ES<sup>+</sup>) calcd. for C<sub>19</sub>H<sub>25</sub>N<sub>3</sub>O<sub>4</sub>NaS (M+Na) 414.1463, found 414.1459.

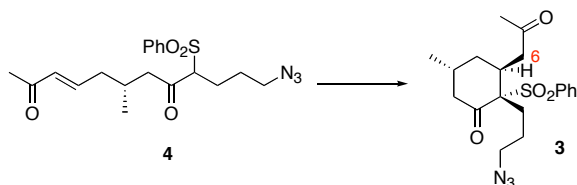

**Cyclohexanone 3:** To a solution of keto sulfone **4** (0.415 g, 1.06 mmol) in CH<sub>2</sub>Cl<sub>2</sub> / Isopropanol (1:4, 5 mL) was added diisopropylamine (0.644 g, 0.89 mL, 6.37 mmol) at room temperature. After 13 h, the solvent was removed *in vacuo*. The reaction mixture was loaded directly onto silica gel and was purified by chromatography,

eluting with 10-30% EtOAc / hexanes, to give the product **3** (0.369 g, 0.944 mmol, 89%) as a white solid. Mp 108-109 °C (recrystallized from hexanes);  $[\alpha]_D^{23} = +145^\circ$  ( $c = 1.04$ ,  $\text{CHCl}_3$ ); IR (neat) 2960, 2927, 2873, 2105, 1718, 1451, 1364, 1299, 1141, 754, 721, 694, 618  $\text{cm}^{-1}$ ;  $^1\text{H}$  NMR (300 MHz,  $\text{CDCl}_3$ )  $\delta$  7.77 (d,  $J = 7.2$  Hz, 2H), 7.71 (t,  $J = 7.6$  Hz, 1H), 7.58 (t,  $J = 7.6$  Hz, 2H), 3.66-3.70 (m, 1H), 3.22-3.28 (m, 2H), 3.09 (d,  $J = 16.8$  Hz, 1H), 2.77 (dd,  $J = 14.4, 9.6$  Hz, 1H), 2.48-2.56 (m, 2H), 2.24 (s, 3H), 1.55-2.07 (m, 7H), 1.05 (d,  $J = 6.8$  Hz, 3H);  $^{13}\text{C}$  NMR (100 MHz,  $\text{CDCl}_3$ )  $\delta$  205.84, 205.77, 135.8, 134.3, 130.1, 128.9, 77.9, 51.5, 47.0, 44.1, 34.0, 31.8, 30.4, 27.5, 26.9, 23.9, 21.5; HRMS (ES+) calcd. for  $\text{C}_{19}\text{H}_{25}\text{N}_3\text{O}_4\text{NaS}$  (M+Na) 414.1463, found 414.1468.

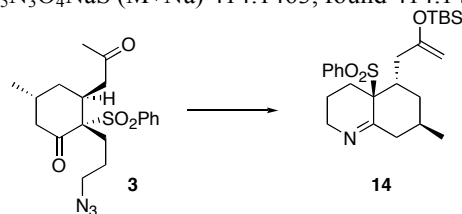

**Imine 14:** To a solution of **3** (400 mg, 1.02 mmol) in THF (31 mL) was added  $\text{PPh}_3$  (0.262 g, 1.02 mmol). The reaction mixture was heated to reflux. After 5 h, the reaction was cooled to rt and the solvent was removed *in vacuo* to give crude imine. This crude imine was immediately redissolved in  $\text{CH}_2\text{Cl}_2$  (10 mL), cooled to 0 °C and *i*- $\text{Pr}_2\text{NEt}$  (0.824 g, 1.1 mL, 6.38 mmol) was added to the solution. After 1 min, TBSOTf (0.674 g, 0.59 mL, 2.55 mmol) was added dropwise. After 5 h, the reaction was removed from the cooling bath, quenched with sat. aq.  $\text{NaHCO}_3$  (15 mL) and extracted with  $\text{CH}_2\text{Cl}_2$  (3 X 15 mL). The dried ( $\text{K}_2\text{CO}_3$ ) extract was concentrated *in vacuo* purified by chromatography over alumina, eluting with 2-10% EtOAc / hexanes, to give **14** (362 mg, 0.834 mmol, 82%) as a colorless oil:  $[\alpha]_D^{23} = +81^\circ$  ( $c = 1.6$ ,  $\text{CHCl}_3$ ); IR (neat) 2954, 2927, 2856, 1631, 1468, 1446, 1310, 1141, 1010, 841, 776, 694, 607  $\text{cm}^{-1}$ ;  $^1\text{H}$  NMR (300 MHz,  $\text{CDCl}_3$ )  $\delta$  7.83-7.85 (m, 2H), 7.63-7.68 (m, 1H), 7.52-7.57 (m, 2H), 4.10 (s, 1H), 4.03 (s, 1H), 3.65 (d,  $J = 15.6$  Hz, 1H), 3.07 (td,  $J = 12.6, 3.9$  Hz, 1H), 2.85-2.89 (m, 1H), 2.41-2.50 (m, 3H), 2.11-2.14 (m, 2H), 1.56-2.02 (m, 6H), 1.05 (d,  $J = 6.6$  Hz, 3H), 0.93 (s, 9H), 0.20 (s, 3H), 0.17 (s, 3H);  $^{13}\text{C}$  NMR (100 MHz,  $\text{CDCl}_3$ )  $\delta$  165.4, 156.1, 137.0, 133.7, 130.0, 129.0, 128.7, 92.0, 69.4, 48.0, 45.7, 38.6, 37.1, 31.7, 29.7, 28.6, 27.7, 25.7, 22.1, 20.7, 18.0, -4.78, -4.83; HRMS (CI+) calcd. for  $\text{C}_{25}\text{H}_{40}\text{NO}_3\text{SiS}$  (M+1) 462.2498, found 462.2480.

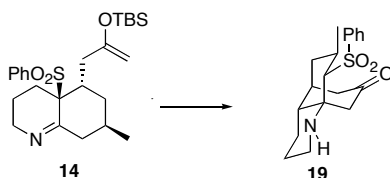

**Tricyclic 19:** To a solution of **14** (256 mg, 0.589 mmol) in dry 1,2-dichloroethane (23 mL) was added  $\text{Zn}(\text{OTf})_2$  (0.643 g, 1.77 mmol). The reaction mixture was heated at 96 °C in a sealed tube. After 16 h, the reaction was cooled to rt, quenched with sat. aq.  $\text{NaHCO}_3$  (5 mL) and extracted with  $\text{CH}_2\text{Cl}_2$  (3 X 10 mL). The dried ( $\text{K}_2\text{CO}_3$ ) extract was concentrated *in vacuo* and purified chromatography over silica gel, eluting with 1-10% MeOH /  $\text{CH}_2\text{Cl}_2$ , to give **19** (104 mg, 0.300 mmol, 54%) as a white solid. Mp 207-208 °C (recrystallized from  $\text{CH}_2\text{Cl}_2$  / hexanes);  $[\alpha]_D^{23} = +9^\circ$  ( $c = 0.4$ ,  $\text{CHCl}_3$ ); IR (neat) 3357, 2927, 2856, 1702, 1473, 1304, 1288, 1135, 1081, 912, 765, 721, 694  $\text{cm}^{-1}$ ;  $^1\text{H}$  NMR (300 MHz,  $\text{CDCl}_3$ )  $\delta$  7.98 (d,  $J = 7.6$  Hz, 2H), 7.55-7.65 (m, 3H), 4.14 (s br, 1H), 3.33 (d,  $J = 11.2$  Hz, 1H), 3.20 (d,  $J = 17.2$  Hz, 1H), 3.07 (d,  $J = 17.2$  Hz, 1H), 2.90-3.00 (m, 2H), 2.54 (dd,  $J = 16.8, 6.4$  Hz, 1H), 2.21-2.30 (m, 2H), 2.03 (s br, 1H), 1.63-1.81 (m, 5H), 1.48 (td,  $J = 13.2, 3.6$  Hz, 1H), 0.78 (d,  $J = 6.0$  Hz, 3H);  $^{13}\text{C}$  NMR (100 MHz,  $\text{CDCl}_3$ )  $\delta$  210.8, 143.9, 133.1, 129.1, 127.2, 81.7, 59.8, 44.3, 43.0, 41.4, 41.2, 40.6, 34.5, 28.5, 26.1, 25.4, 22.3; HRMS (EI+) calcd. for  $\text{C}_{19}\text{H}_{25}\text{NO}_3\text{S}$  (M+) 347.1555, found 347.1560.

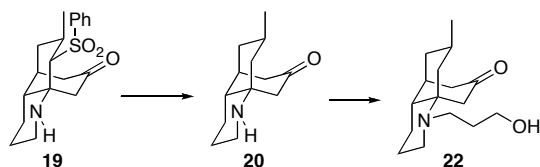

**Alcohol 22:** To a stirred solution of **19** (89 mg, 0.256 mmol) in THF (2.5 mL) and MeOH (7.5 mL) at  $-10^{\circ}\text{C}$  was added  $\text{Na}_2\text{HPO}_4$  (254 mg, 1.792 mmol). After 1 min, 5% Na / Hg amalgam (708 mg, 1.539 mmol, 5% in Hg) was added. After 1 h, the reaction was diluted with 20% EtOAc / hexanes, filtered through a small plug of alumina, concentrated *in vacuo* to give crude amine. The crude amine **20** (0.256 mmol) in acetone (2.6 mL) was added  $\text{K}_2\text{CO}_3$  (75 mg, 0.543 mmol) and  $\text{NaHCO}_3$  (75 mg, 0.892 mmol) followed by 3-iodo-1-propanol (71 mg, 37  $\mu\text{L}$ , 0.384 mmol). The reaction mixture was heated to reflux. After 6 h, the reaction was cooled to rt and the solvent was removed *in vacuo*. The reaction mixture was purified by chromatography over silica gel, eluting with 1-10% MeOH /  $\text{CH}_2\text{Cl}_2$ , to give known **22**<sup>5</sup> (46 mg, 0.174 mmol, 68%) as a light yellow liquid.  $[\alpha]_{\text{D}}^{23} = -11^{\circ}$  ( $c = 0.9$ ,  $\text{CHCl}_3$ ); IR (neat) 3320, 2900, 1700, 1460, 1410, 1335, 1310, 1220, 1170, 1110, 1060, 980, 725  $\text{cm}^{-1}$ ;  $^1\text{H}$  NMR (400 MHz,  $\text{CDCl}_3$ )  $\delta$  3.76-3.86 (m, 2H), 3.07-3.15 (m, 2H), 2.68 (d,  $J = 17.0$  Hz, 1H), 2.51 (dd,  $J = 17.0, 7.0$  Hz, 1H), 2.3-1.3 (m, 16H), 1.19 (t,  $J = 11.0$  Hz, 1H), 0.93 (d,  $J = 6.0$  Hz, 3H);  $^{13}\text{C}$  NMR (100 MHz,  $\text{CDCl}_3$ )  $\delta$  212.3, 64.4, 59.3, 48.4, 46.8, 46.6, 44.0, 42.4, 41.7, 39.1, 35.9, 27.8, 25.81, 25.75, 25.5, 22.6; HRMS (EI+) calcd. for  $\text{C}_{16}\text{H}_{27}\text{NO}_2$  (M+) 265.2027, found 265.2042.

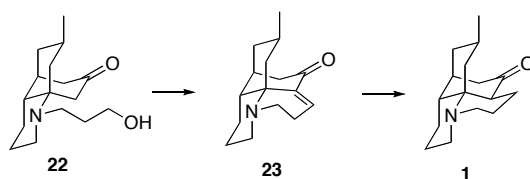

**Lycopodine (1):** To a mixture of *t*BuOK (20.1 mg, 0.179 mmol) and benzophenone (97.7 mg, 0.536 mmol) in dry benzene (0.1 mL) was added a solution of **22** (7.9 mg, 0.0298 mmol) in dry benzene (0.2 mL). The resulting reaction mixture was heated at  $110^{\circ}\text{C}$  in sealed tube. After 50 min, the reaction was cooled to rt, diluted with aq. HCl (0.5 mL, 3 N) and washed with  $\text{Et}_2\text{O}$  (2 X 5 mL). The aqueous phase was neutralized to pH 11 by aq. NaOH (6 N) and extracted with  $\text{CH}_2\text{Cl}_2$  (3 X 5 mL). The dried ( $\text{K}_2\text{CO}_3$ ) extract was concentrated *in vacuo* and used next step immediately. To a stirred solution of crude enone **23** (0.179 mmol) in PhMe (0.3 mL) at room temperature was added  $[(\text{PPh}_3)\text{CuH}]_6$  (29.3 mg, 0.015 mmol). After 2 h, another portion of  $[(\text{PPh}_3)\text{CuH}]_6$  (29.3 mg, 0.015 mmol) was added. After an additional 2 h, the reaction mixture was loaded directly onto alumina, eluting with 10-50% ether / benzene, to give lycopodine (**1**)<sup>6</sup> (4.2 mg, 0.017 mmol, 57%) as a white solid. Mp  $126\text{-}127^{\circ}\text{C}$  (recrystallized from  $\text{Et}_2\text{O}$  / hexanes),  $[\alpha]_{\text{D}}^{23} = -23.2^{\circ}$  ( $c = 0.22$ , EtOH) {lit.<sup>7</sup>  $[\alpha]_{\text{D}}^{23} = -24.5^{\circ}$  ( $c = 1.10$ , 100% EtOH)}; IR (neat) 2922, 2850, 1702, 1451, 1380, 1314, 1255, 1215, 1119, 1092, 1015, 906, 808  $\text{cm}^{-1}$ ;  $^1\text{H}$  NMR (400 MHz,  $\text{CDCl}_3$ )  $\delta$  3.39 (td,  $J = 14.0, 3.6$  Hz, 1H), 3.17 (td,  $J = 12.0, 3.0$  Hz, 1H), 2.89 (dd,  $J = 12.0, 2.4$  Hz, 1H), 2.66 (dd,  $J = 12.0, 2.4$  Hz, 2H), 2.55 (td,  $J = 16.0, 6.4$  Hz, 2H), 2.22 (d,  $J = 17.6$  Hz, 1H), 2.06-2.11 (m, 3H), 1.20-1.92 (m, 11H), 0.88 (d,  $J = 6.4$  Hz, 3H);  $^{13}\text{C}$  NMR (100 MHz,  $\text{CDCl}_3$ )  $\delta$  213.7, 59.9, 47.2, 46.6, 44.9, 43.1, 42.99, 42.84, 42.4, 36.7, 26.1, 25.3, 25.1, 22.9, 19.5, 18.8; HRMS (EI+) calcd. for  $\text{C}_{16}\text{H}_{25}\text{NO}$  (M+) 247.1936, found 247.1948.

## References

- 
1. Vanderwalle, M; Van der Eychen, J.; Oppolzer, W.; Vullioud, C. *Tetrahedron* **1986**, *42*, 4035-4043.
  2. Boulet, S. L.; Paquette, L. A. *Synthesis* **2002**, 895-900.
  3. **Preparation of LiTMP:** To a solution of 2,2,6,6-tetramethylpiperidine (282.8 mg, 340  $\mu$ L, 2.0 mmol) in THF (0.86 mL) was added *n*-BuLi (0.8 mL, 2.0 mmol, 2.5 M in hexanes). The reaction was warmed to  $-10^{\circ}\text{C}$  and stirred for 30 min prior to use.
  4. We purchase **10** (70% pure) from Aldrich's Flavors and Fragrances division (Aldrich Catalog # W341703, 25 g - \$92). The impurity (mesityl oxide) does not affect the performance of the cross metathesis. Alternate sources of **10** were significantly higher in cost and less pure.
  5. (a) Heathcock, C. H.; Kleinman, E. F.; Binkley, E. S. *J. Am. Chem. Soc.* **1982**, *104*, 1054-1068. (b) Schumann, D.; Mueller, H. J.; Naumann, A. *Lebig Ann. Chem.* **1982**, 1700-1705.
  6. (a) Kraus, G. A.; Hon, Y. S. *Heterocycles* **1987**, *25*, 377-386. (b) Nakashima, T. T.; Singer, P. P.; Browne, L. M.; Ayer, W. A. *Can. J. Chem.* **1975**, *53*, 1936-1942.
  7. Douglas, B.; Lewis, D. G.; Marion, L. *Can. J. Chem.* **1953**, *31*, 272-276.
